# Supplementary material
Source: PubMed Central journal article supplement (PMC1173153)
Supplement: 7600712s1.pdf [file 7600712s1.pdf]

# Supplementary Fig. S1

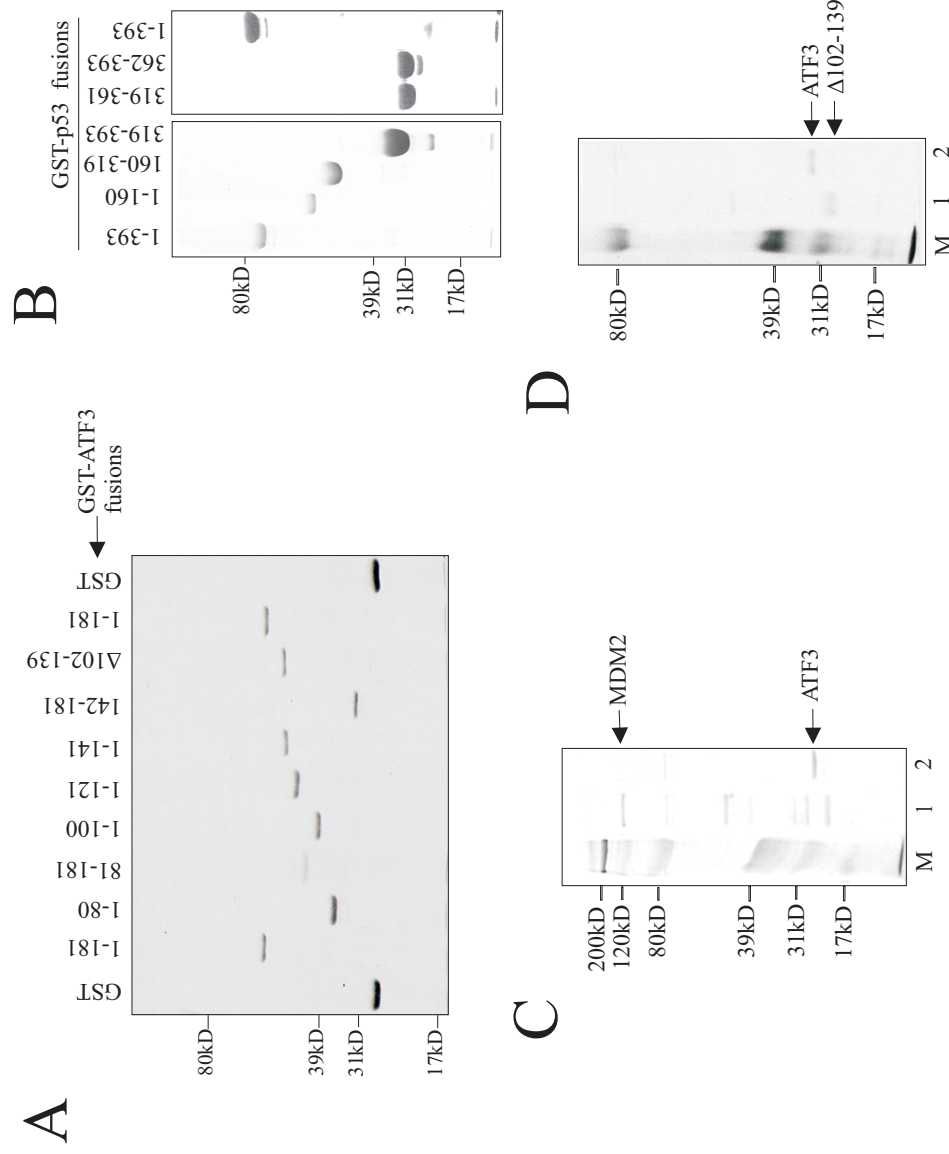

**Fig. S1. Preparation of GST fusions and purified recombinant proteins.**

(A) Truncated ATF3 cDNA fragments were prepared with PCR and fused to the GST sequence. The fusion proteins produced in bacteria were purified with glutathione agarose, and stained with Coomassie blue stain on a polyacrylamide gel. (B) The fusion proteins were resolved by electrophoresis and stained with Coomassie blue. (C) Recombinant MDM2 and ATF3 proteins were expressed in the BL21 bacteria strain, and purified with glutathione-agarose and Ni<sup>2+</sup>-NTA-agarose, respectively. The proteins were stained with Coomassie blue on a polyacrylamide gel. (D) An ATF3 full length (lane 1) or mutant protein (lane 2) deleted of amino acids 102-139 (Δ102-139) was expressed in bacteria and purified with glutathione agarose. The proteins were resolved by SDS-PAGE and stained with Coomassie blue.
