# Supplementary material
Source: PubMed Central journal article supplement (PMC1173153)
Supplement: 7600712s2.pdf [file 7600712s2.pdf]

## Supplementary Fig S2

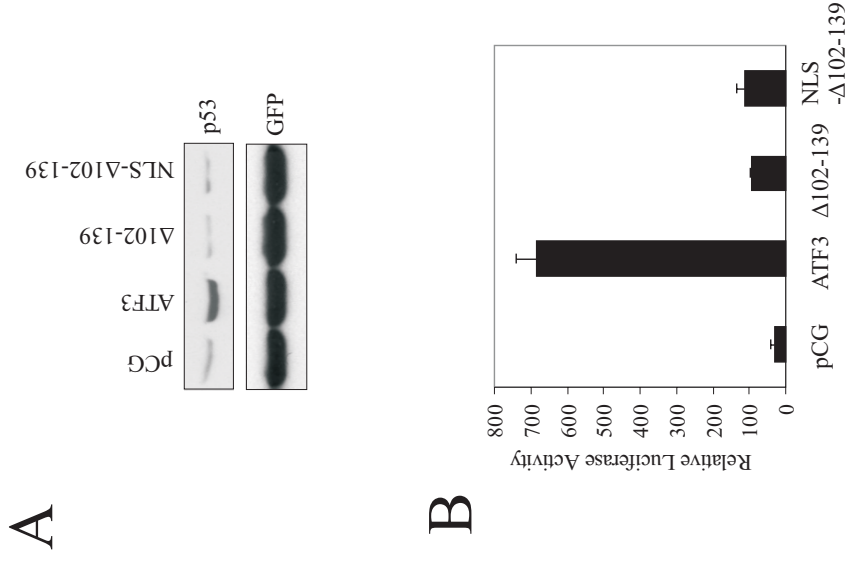

**Fig S2. Re-localization of the mutant ATF3 protein to the nucleus fails to stabilize p53 or promote *trans*-activation of a p53 target promoter.** H1299 cells were transfected as in Fig 3C (A) or Fig 7A (B), with the exception that a plasmid expressing a NLS-tagged mutant ATF3 protein (NLS Δ102-139) was also included. The cells were harvested and subjected to Western blotting for p53 protein (A) or luciferase assays (B).
