# Supplementary material
Source: PubMed Central journal article supplement (PMC1173153)
Supplement: 7600712s4.pdf [file 7600712s4.pdf]

## Supplementary Fig S4

### A

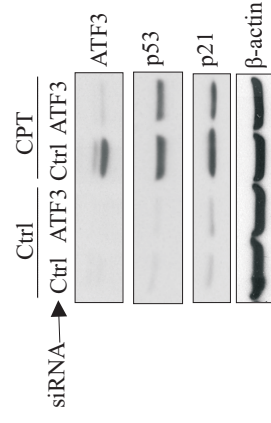

### B

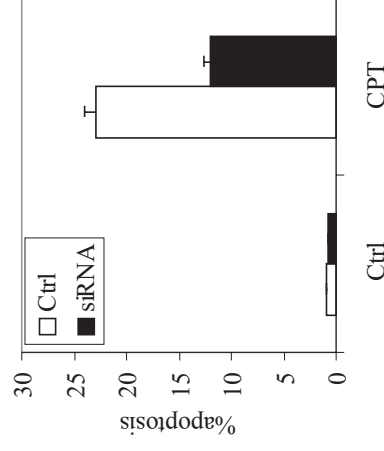

#### Fig S4. Acute lowering of ATF3 levels impairs p53 activation.

(A) A549 cells were transfected with 100 nM ATF3 siRNA or scrambled RNA (Ctrl) for 72 h. Camptothecin (CPT) (5  $\mu$ M final concentration) or vehicle (DMSO) was added and the cells treated for 24 h. The cells were harvested and subjected to Western blotting (A). (B) A549 cells were treated as in (A), but harvested 34 h post-CPT treatment. The cells were subjected to TUNEL staining assays for apoptotic nuclei.
